# Supplementary material
Source: publisher site journal article supplement (https://www.spandidos-publications.com/1875/downloadSupplementary)
Supplement: Supplementary file 1 [file downloadSupplementary]

## Sheet: Supplementary table 2
Table SII. Definitions of gene abbreviations in Figure 4.
Gene Symbol	Gene Name
A1/Bfl-1	BCL2 related protein A1
A20	TNF alpha induced protein 3
ATM	ATM serine/threonine kinase
BAFF	TNF superfamily member 13b
BAFF-R	tumor necrosis factor receptor superfamily member 13C
BCL10	BCL10 immune signaling adaptor
Bcl10	BCL10 immune signaling adaptor
BCL2	BCL2 apoptosis regulator
Bcl-2	BCL2 apoptosis regulator
BCL2A1	BCL2 related protein A1
BCL2L1	BCL2 like 1
BCR	BCR activator of RhoGEF and GTPase
BIRC2	baculoviral IAP repeat containing 2
BLC	C-X-C motif chemokine ligand 13
BLNK	B cell linker
BTK	Bruton tyrosine kinase
Btk	Bruton tyrosine kinase
Btk	Bruton tyrosine kinase
CARD10	caspase recruitment domain family member 10
CARMA	Caspase recruitment domain-containing protein 11
CCL13	C-C motif chemokine ligand 13
CCL19	C-C motif chemokine ligand 19
CCL21	C-C motif chemokine ligand 21
CCL4	C-C motif chemokine ligand 4
CD14	CD14 molecule
CD40	CD40 molecule
CD40LG	CD40 ligand
CFLAR	CASP8 and FADD like apoptosis regulator
c-FLIP	CASP8 and FADD like apoptosis regulator
CHUK	component of inhibitor of nuclear factor kappa B kinase complex
c-IAP1/2	baculoviral IAP repeat containing 2/3
CK2	casein kinase 2 alpha 1
CNTF	ciliary neurotrophic factor
COX2	cytochrome c oxidase subunit II
CSNK2A1	casein kinase 2 alpha 1
CXCL12	C-X-C motif chemokine ligand 12
CXCL2	C-X-C motif chemokine ligand 2
CXCL8	C-X-C motif chemokine ligand 8
CYLD	CYLD lysine 63 deubiquitinase
DDX58	DExD/H-box helicase 58
EDA	ectodysplasin A
EDA2R	ectodysplasin A2 receptor
EDAR	ectodysplasin A receptor
EDARADD	EDAR associated death domain
EGF	epidermal growth factor
ELC	C-C motif chemokine ligand 19
ELKS	ELKS/RAB6-interacting/CAST family member 1
ERC1	ELKS/RAB6-interacting/CAST family member 1
GADD45A	growth arrest and DNA damage inducible alpha
gadd45β	growth arrest and DNA damage inducible beta
ICAM	intercellular adhesion molecule
ICAM1	intercellular adhesion molecule 1
IKBKB	inhibitor of nuclear factor kappa B kinase subunit beta
IKBKG	inhibitor of nuclear factor kappa B kinase regulatory subunit gamma
IkBα	NFKB inhibitor alpha
IKKα	component of inhibitor of nuclear factor kappa B kinase complex
IKKα	inhibitor of nuclear factor kappa B kinase subunit alpha
IKKβ	inhibitor of nuclear factor kappa B kinase subunit beta
IL1B	interleukin 1 beta
IL1R1	interleukin 1 receptor type 1
IL-1β	interleukin 1β
IL8	interleukin 8
IRAK1	interleukin 1 receptor associated kinase 1
IRAK1/4	interleukin 1 receptor associated kinase 1/4
LAT	linker for activation of T cells
LBP	lipopolysaccharide binding protein
LCK	LCK proto-oncogene, Src family tyrosine kinase
Lck	LCK proto-oncogene, Src family tyrosine kinase
LIGHT	TNF superfamily member 14
LOC102723407	immunoglobulin heavy variable 4-38-2-like
LTA	lymphotoxin alpha
LTB	lymphotoxin beta
LTBR	lymphotoxin beta receptor
LY96	lymphocyte antigen 96
LYN	LYN proto-oncogene, Src family tyrosine kinase
Lyn	LYN proto-oncogene, Src family tyrosine kinase
MALT1	MALT1 paracaspase
MAP3K14	mitogen-activated protein kinase kinase kinase 14
MAP3K7	mitogen-activated protein kinase kinase kinase 7
MD-2	lymphocyte antigen 96
MEMO	mediator of cell motility 1
MIP-2	C-X-C motif chemokine ligand 2
MYD88	MYD88 innate immune signal transduction adaptor
NFKB1	nuclear factor kappa B subunit 1
NFKB2	nuclear factor kappa B subunit 2
NFKBIA	NFKB inhibitor alpha
NGF	nerve growth factor
NIK	mitogen-activated protein kinase kinase kinase 14
p100	nuclear factor kappa B subunit 2
PARP1	poly(ADP-ribose) polymerase 1
PIAS4	protein inhibitor of activated STAT 4
PIASY	protein inhibitor of activated STAT 4?
PIDD	p53-induced death domain protein 1
PIDD1	p53-induced death domain protein 1
PKCβ	protein kinase C beta
PLAU	plasminogen activator, urokinase
PLCG1	phospholipase C gamma 1
PLCG2	phospholipase C gamma 2
PLCγ2	phospholipase C gamma 2
PRKCB	protein kinase C beta
PRKCQ	protein kinase C theta
PTGS2	prostaglandin-endoperoxide synthase 2
RANK	TNF receptor superfamily member 11a
RANKL	TNF superfamily member 11
RELA	RELA proto-oncogene, NF-kB subunit
RELB	RELB proto-oncogene, NF-kB subunit
RelB	RELB proto-oncogene, NF-kB subunit
RIG-I	DExD/H-box helicase 58
RIP1	receptor interacting serine/threonine kinase 1
RIP1	receptor interacting serine/threonine kinase 1
RIPK1	receptor interacting serine/threonine kinase 1
SDF-1α	stromal cell-derived factor 1 α
SLC	C-C motif chemokine ligand 21
SYK	spleen associated tyrosine kinase
Syk	spleen associated tyrosine kinase
TAB	TGF-beta activated kinase 1 (MAP3K7) binding protein
TAB1	TGF-beta activated kinase 1 (MAP3K7) binding protein 1
TAK1	nuclear receptor subfamily 2 group C member 2?
TCR	T cell receptor
TICAM1	toll like receptor adaptor molecule 1
TICAM2	toll like receptor adaptor molecule 2
TIRAP	TIR domain containing adaptor protein
TLR4	toll like receptor 4
TNF	tumor necrosis factor
TNFAIP3	TNF alpha induced protein 3
TNFRSF11A	TNF receptor superfamily member 11a
TNFRSF13C	TNF receptor superfamily member 13C
TNFRSF1A	TNF receptor superfamily member 1A
TNFSF11	TNF superfamily member 11
TNFSF13B	TNF superfamily member 13b
TNFSF14	TNF superfamily member 14
TNF-α	tumour necrosis factor alpha
TRADD	TNFRSF1A associated via death domain
TRAF1	TNF receptor associated factor 1
TRAF1/2	TNF receptor associated factor 1/2
TRAF2	TNF receptor associated factor 2
TRAF3	TNF receptor associated factor 3
TRAF5	TNF receptor associated factor 5
TRAF6	TNF receptor associated factor 6
TRAM	translocation associated membrane protein 1
TRIF	TIR-domain-containing adapter-inducing interferon-β
TRIM25	tripartite motif containing 25
TRIM-25	tripartite motif containing 25
UBE2I	ubiquitin conjugating enzyme E2 I
uPA	plasminogen activator, urokinase
VCAM1	vascular cell adhesion molecule 1
XIAP	X-linked inhibitor of apoptosis
Zap	zinc finger CCCH-type containing, antiviral 1
ZAP70	zeta chain of T cell receptor associated protein kinase 70
